# Supplementary material for: Biomarkers of inflammation in infants with cystic fibrosis
Source: Springer Nature journal article supplement (doi:10.1186/s12931-017-0713-8), 2018-01-08
Supplement: MOESM1 [file 15350008]

|                             | Healthy              | CF                         |
|-----------------------------|----------------------|----------------------------|
| CCSP: BAL (ng/mL)           | NA (NA, NA)          | 150.35 (109.08, 164.47)    |
| CCSP: plasma (ng/mL)        | NA (NA, NA)          | 2111.25 (1767.34, 2500.56) |
| Desmosine: urine (pmD/ml)   | 97 (7, 962.77)       | 279.07 (216.08, 467.79)    |
| Desmosine: urine (pmD/mgCr) | 30.25 (23.81, 67.62) | 62.25 (40.5, 230.81)       |
| Desmosine: BAL (pmD/ml)     | NA (NA, NA)          | 10.29 (4.91, 31.16)        |
| Desmosine: BAL (pmD/mgP)    | NA (NA, NA)          | 269.48 (82.5, 518.04)      |
| Cathepsin B: urine (ng/mL)  | 0.59 (0.27, 0.91)    | 0.83 (0.4, 2.46)           |
| Cathepsin B: BAL (ng/mL)    | NA (NA, NA)          | 10.79 (6.79, 14.52)        |

Additional File #1

Table 1: Summary of biomarkers in healthy controls and infants with cystic fibrosis at the earliest study visit with near complete data. Data are summarized in terms of medians and quartiles.
