# Supplementary material for: Biomarkers of inflammation in infants with cystic fibrosis
Source: Springer Nature journal article supplement (doi:10.1186/s12931-017-0713-8), 2018-01-08
Supplement: MOESM4 [file 15350008]

|                                                    | Number Negative | Number Positive |
|----------------------------------------------------|-----------------|-----------------|
| Acinetobacter baumannii complex                    | 99              | 1               |
| Acinetobacter lwoffii                              | 99              | 1               |
| Acinetobacter species                              | 99              | 1               |
| Bacillus cereus group, not anthracis               | 99              | 1               |
| Beta hemolytic Streptococcus group A               | 97              | 3               |
| Beta hemolytic Streptococcus, not group A          | 94              | 6               |
| Bipolaris Species                                  | 99              | 1               |
| Coagulase Positive Staphylococcus                  | 100             | 0               |
| Enterobacter cloacae complex                       | 96              | 4               |
| Escherichia coli                                   | 91              | 9               |
| Escherichia hermannii                              | 99              | 1               |
| Haemophilus influenzae                             | 78              | 22              |
| Haemophilus parainfluenzae                         | 99              | 1               |
| Klebsiella oxytoca                                 | 98              | 2               |
| Klebsiella pneumoniae                              | 96              | 4               |
| Methicillin resistant Staphylococcus aureus (MRSA) | 98              | 2               |
| Moraxella (Branhamella) catarrhalis                | 91              | 9               |
| Pseudomonas aeruginosa                             | 95              | 5               |
| Proteus mirabilis                                  | 99              | 1               |
| Paracoccus yeeii                                   | 99              | 1               |
| Pantoea species                                    | 99              | 1               |
| Staphylococcus aureus                              | 53              | 47              |
| Staphylococcus intermedius                         | 99              | 1               |
| Stenotrophomonas maltophilia                       | 98              | 2               |
| Serratia marcescens                                | 99              | 1               |
| Streptococcus pneumoniae                           | 88              | 12              |
| Staphylococcus pseudointermedius                   | 99              | 1               |

Additional File #4

Table 2: The numbers of samples from cystic fibrosis infants that test positive for a collection of microorganisms.
